# Supplementary material for: Phase III study of gefitinib or pemetrexed with carboplatin in EGFR-mutated advanced lung adenocarcinoma
Source: PubMed Central journal article supplement — ESMO Open. 2017 Apr 27;2(1):e000168. doi: 10.1136/esmoopen-2017-000168 (PMC5519810; doi:10.1136/esmoopen-2017-000168), 2017-04-27
Supplement: esmoopen-2017-000168supp001.pdf [file esmoopen-2017-000168supp001.pdf]

|               | Arm A ( Gefitinib arm)<br>N=145 | Arm B ( Pemetrexed-Platinum arm)<br>N=145 |
|---------------|---------------------------------|-------------------------------------------|
| CR            | 1 (0.7%)                        | 0                                         |
| PR            | 86 (59.3%)                      | 59 (40.7%)                                |
| SD            | 38 (26.2%)                      | 55 (37.9%)                                |
| PD            | 12 (8.3%)                       | 16 (11.0%)                                |
| Not evaluable | 8 (5.5%)                        | 15 (10.4%)                                |

Table S1 : Response details in both arms.

|                       | Median PFS in months | HR   | 95% CI HR | P value |
|-----------------------|----------------------|------|-----------|---------|
| Age                   |                      |      |           |         |
| Non elderly (n= 247)  | 6.6 (95%CI 5.5-7.6)  | 0.77 | 0.55-1.08 | 0.128   |
| Elderly (n=43)        | 6.2 (95%CI 5.6-6.8)  |      |           |         |
| Gender                |                      |      |           |         |
| Male ( n=164)         | 5.7 (95%CI 4.5-7.1)  | 1.58 | 1.20-2.08 | 0.001   |
| Female ( n=126)       | 8.6 (95%CI 6.7-10.5) |      |           |         |
| Smoking history       |                      |      |           |         |
| Ex smoker ( n=60)     | 6.1 (95%CI 4.6-7.5)  | 1.05 | 0.76-1.46 | 0.755   |
| Never smoker ( n=230) | 6.5 (95%CI 5.6-7.5)  |      |           |         |
| Tobacco history       |                      |      |           |         |
| Present ( n=111)      | 5.7 (95%CI 3.9-7.5)  | 1.08 | 0.83-1.41 | 0.552   |

|                                  |                       |      |           |       |
|----------------------------------|-----------------------|------|-----------|-------|
| Absent ( n=179)                  | 7.2 (95%CI 5.8-8.6)   |      |           |       |
| ECOG PS                          |                       |      |           |       |
| PS 0-1 ( n=273)                  | 6.4 (95%CI 5.7-7.1)   | 0.89 | 0.53-1.49 | 0.644 |
| PS 2 ( n=17)                     | 5.7 (95%CI 3.4-8.0)   |      |           |       |
| Stage                            |                       |      |           |       |
| Stage III ( n=5)                 | 8.5 (95%CI 2.4-14.6)  | 1.15 | 0.46-2.87 | 0.766 |
| Stage IV ( n=285)                | 6.4 (95%CI 5.7-7.0)   |      |           |       |
| Presence of brain metastasis     |                       |      |           |       |
| Yes ( n=45)                      | 5.6 (95%CI 3.4-7.8)   | 1.44 | 1.03-2.02 | 0.034 |
| No ( n=245)                      | 6.6 (95%CI 5.4-7.5)   |      |           |       |
| Presence of liver metastasis     |                       |      |           |       |
| Yes ( n=75)                      | 5.6 (95%CI 3.6-7.6)   | 1.55 | 1.16-2.07 | 0.003 |
| No ( n=215)                      | 6.5 (95%CI 5.3-7.8)   |      |           |       |
| EGFR mutation status             |                       |      |           |       |
| Exon 21( n=116)                  | 6.7 (95%CI 5.5-7.9)   | 1.03 | 0.79-1.34 | 0.836 |
| Exon 19 ( n=168)                 | 6.3 (95%CI 6.0-6.6)   |      |           |       |
| Study arm                        |                       |      |           |       |
| Pemetrexed Platinum arm ( n=145) | 5.6 (95% CI 4.2-7.0)  | 0.65 | 0.50-0.85 | 0.001 |
| Gefitinib arm ( n=145)           | 8.4 ( 95%CI 6.3-10.5) |      |           |       |

Table S2 : Multivariate analysis details of progression free survival.

|                      | Median OS in months    | HR   | 95% CI HR | P value |
|----------------------|------------------------|------|-----------|---------|
| Age                  |                        |      |           |         |
| Non elderly (n= 247) | 20.5 (95%CI 17.3-23.8) | 0.91 | 0.57-1.44 | 0.672   |

|                              |                        |       |           |       |
|------------------------------|------------------------|-------|-----------|-------|
| Elderly (n=43)               | 18.8 (95%CI 16.5-21.1) |       |           |       |
| Gender                       |                        |       |           |       |
| Male ( n=164)                | 18.8 (95%CI 16.8-20.8) | 1.70  | 1.18-2.41 | 0.004 |
| Female ( n=126)              | 24.2 (95%CI 19.4-29.1) |       |           |       |
| Smoking history              |                        |       |           |       |
| Ex smoker ( n=60)            | 16.9 (95%CI 12.8-21.0) | 1.23  | 0.83-1.82 | 0.305 |
| Never smoker ( n=230)        | 21.5 (95%CI 18.5-24.6) |       |           |       |
| Tobacco history              |                        |       |           |       |
| Present ( n=111)             | 18.8 (95%CI 14.1-23.5) | 1.07  | 0.77-1.48 | 0.699 |
| Absent ( n=179)              | 20.9 (95%CI 18.0-23.8) |       |           |       |
| ECOG PS                      |                        |       |           |       |
| PS 0-1 ( n=273)              | 20.5 (95%CI 17.8-23.3) | 0.58  | 0.31-3.24 | 0.082 |
| PS 2 ( n=17)                 | 12.2 (95%CI 6.9-17.6)  |       |           |       |
| Stage                        |                        |       |           |       |
| Stage III ( n=5)             | 28.9 (95%CI 0.2-57.6)  | 1.01  | 0.31-3.24 | 0.992 |
| Stage IV ( n=285)            | 19.8 (95%CI 16.9-22.6) |       |           |       |
| Presence of brain metastasis |                        |       |           |       |
| Yes ( n=45)                  | 19.4(95%CI 17.0-21.9)  | 1.50  | 1.01-2.24 | 0.047 |
| No ( n=245)                  | 20.9 (95%CI 17.4-24.3) |       |           |       |
| Presence of liver metastasis |                        |       |           |       |
| Yes ( n=75)                  | 17.3 (95%CI 14.3-20.3) | 1.51  | 1.06-2.15 | 0.023 |
| No ( n=215)                  | 22.6 (95%CI 19.5-25.7) |       |           |       |
| EGFR mutation status         |                        |       |           |       |
| Exon 21( n=116)              | 17.7 (95%CI 13.8-21.6) | 1.654 | 1.19-2.30 | 0.003 |
| Exon 19 ( n=168)             | 23.0 (95%CI 19.3-26.6) |       |           |       |

| Study arm                        |                         |      |           |       |
|----------------------------------|-------------------------|------|-----------|-------|
| Pemetrexed Platinum arm ( n=145) | 22.6 (95% CI 18.6-26.6) | 1.28 | 0.92-1.79 | 0.133 |
| Gefitinib arm ( n=145)           | 18.0 ( 95%CI 15.2-20.8) |      |           |       |

Table S3 : Multivariate analysis details of overall survival .

Figure 1S : Study protocol

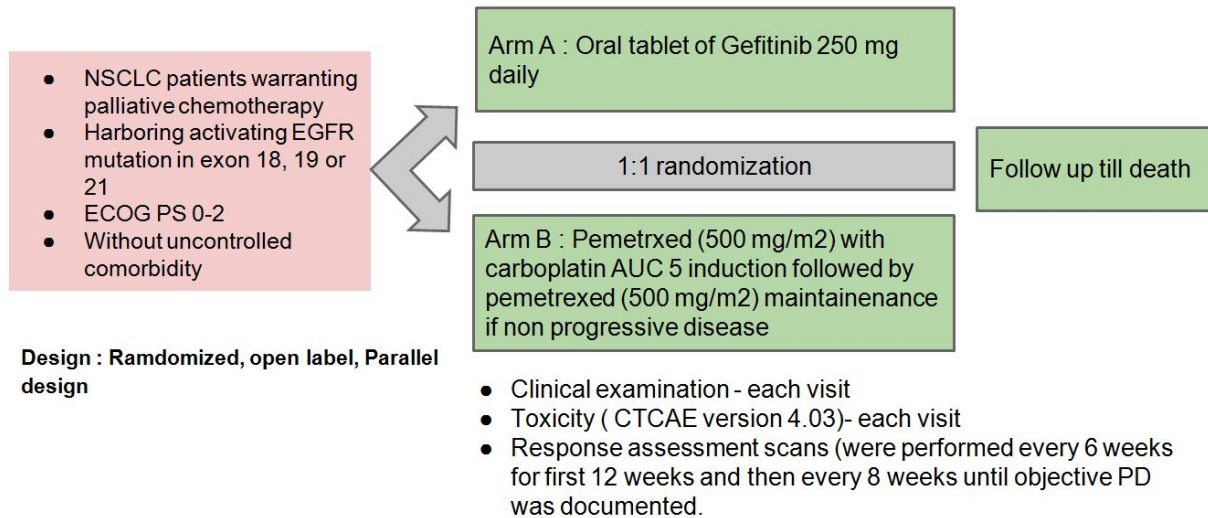

To demonstrate a 50% improvement in PFS for gefitinib as compared to pemetrexed-carboplatin, with 80% power and 5% type one error and with an expected dropout rate of 5%, we planned to enroll 290 patients.
